# Supplementary material for: How Does Flexibility Affect Environmental Performance? Evidence from the Power Generation Industry
Source: Atypon-hosted journal article supplement (doi:10.1287/msom.2023.0522), 2024-12-20
Supplement: msom.2023.0522.sm1.pdf [file msom.2023.0522.sm1.pdf]

# Online Appendix

This section presents additional details pertinent to our analysis.

**Table A1 – Correlations**

| Variable                                           | 1        | 2        | 3        | 4        | 5        | 6        | 7        | 8        | 9        | 10       | 11       | 12      | 13      | 14      |
|----------------------------------------------------|----------|----------|----------|----------|----------|----------|----------|----------|----------|----------|----------|---------|---------|---------|
| 1 Ln (Carbon Dioxide Emissions per MWh)            | 1.0000   |          |          |          |          |          |          |          |          |          |          |         |         |         |
| 2 Possesses Fuel Flexibility – PFF                 | -0.0924* | 1.0000   |          |          |          |          |          |          |          |          |          |         |         |         |
| 3 Possesses Volume Flexibility - PVF               | -0.1839* | 0.2752*  | 1.0000   |          |          |          |          |          |          |          |          |         |         |         |
| 4 Usage of Fuel Flexibility – UFF                  | 0.0536*  | 0.2251*  | 0.1069*  | 1.0000   |          |          |          |          |          |          |          |         |         |         |
| 5 Usage of Volume Flexibility – UVF                | 0.1057*  | 0.1353*  | 0.3283*  | 0.0454*  | 1.0000   |          |          |          |          |          |          |         |         |         |
| 6 Fuel Cost per MMBtu (USD)                        | -0.2229* | 0.1741*  | 0.2724*  | 0.0681*  | 0.1915*  | 1.0000   |          |          |          |          |          |         |         |         |
| 7 Fuel Emission Intensity (CO <sub>2</sub> /MMBtu) | 0.6666*  | -0.2962* | -0.5353* | -0.0200* | -0.1979* | -0.3800* | 1.0000   |          |          |          |          |         |         |         |
| 8 Generating Hours                                 | 0.1928*  | -0.2842* | -0.7019* | -0.1258* | -0.3663* | -0.3168* | 0.6068*  | 1.0000   |          |          |          |         |         |         |
| 9 Age (months)                                     | 0.5158*  | -0.1805* | -0.5505* | -0.0241* | -0.1774* | -0.2804* | 0.6173*  | 0.4238*  | 1.0000   |          |          |         |         |         |
| 10 Capacity (in MW)                                | -0.0392* | -0.1936* | -0.4907* | -0.0743* | -0.1898* | -0.1353* | 0.2867*  | 0.4584*  | 0.0131*  | 1.0000   |          |         |         |         |
| 11 Fraction - Renewable                            | -0.1294* | -0.0605* | 0.0488*  | -0.0419* | 0.0046*  | -0.0114* | -0.1466* | -0.0760* | -0.0097* | -0.0440* | 1.0000   |         |         |         |
| 12 SO <sub>2</sub> Control Equipment               | -0.2053* | 0.0428*  | 0.1911*  | -0.0091* | 0.0695*  | 0.1051*  | -0.1551* | -0.1243* | -0.3889* | 0.1500*  | 0.0524*  | 1.0000  |         |         |
| 13 NOX Control Equipment                           | 0.3099*  | -0.1759* | -0.2577* | -0.0532* | -0.1009* | -0.1791* | 0.4688*  | 0.3007*  | 0.1729*  | 0.3034*  | 0.0181*  | 0.1342* | 1.0000  |         |
| 14 Mercury Control Equipment                       | 0.1112*  | -0.0591* | -0.0946* | -0.0118* | -0.0380* | -0.0583* | 0.1692*  | 0.1005*  | 0.1062*  | 0.1204*  | 0.1132*  | 0.0754* | 0.1664* | 1.0000  |
| 15 CO <sub>2</sub> Control Equipment               | 0.0235*  | -0.0118* | -0.0225* | -0.0021  | -0.0083* | -0.0112* | 0.0350*  | 0.0222*  | 0.0197*  | 0.0335*  | -0.0100* | 0.0131* | 0.0770* | 0.0070* |

Notes: \* indicates significance at  $p < 0.05$

**Table A2: Data Sources**

| Variable                                        | Source             |
|-------------------------------------------------|--------------------|
| Carbon Dioxide Emissions per MWh                | ABB Velocity Suite |
| Possesses Fuel Flexibility                      | ABB Velocity Suite |
| Possesses Volume Flexibility                    | EIA Form-860       |
| Usage of Fuel Flexibility                       | ABB Velocity Suite |
| Usage of Volume Flexibility                     | ABB Velocity Suite |
| Fuel Cost per MMBtu (USD)                       | ABB Velocity Suite |
| Generating Hours                                | ABB Velocity Suite |
| Age                                             | ABB Velocity Suite |
| Capacity                                        | ABB Velocity Suite |
| Fuel Category                                   | ABB Velocity Suite |
| Steam turbine primary mover fixed effects       | ABB Velocity Suite |
| Gas turbine primary mover fixed effects         | ABB Velocity Suite |
| Combined cycle primary mover fixed effects      | ABB Velocity Suite |
| SO <sub>2</sub> control technology fixed effect | ABB Velocity Suite |
| NO <sub>x</sub> control technology fixed effect | ABB Velocity Suite |
| Hg control technology fixed effect              | ABB Velocity Suite |
| CO <sub>2</sub> control technology fixed effect | ABB Velocity Suite |

**Table A3: Carbon Emissions per MWH for Different Levels of Volume Flexibility**

| Time to Start | Column 1 | Column 2 | Column 3 | Column 4 |
|---------------|----------|----------|----------|----------|
| 1/6 hour      | 1763.47  | 1765.61  | 1498.51  | 1499.63  |
| 1 hour        | 1736.97  | 1738.96  | 1478.64  | 1479.66  |
| 12 hour       | 1573.80  | 1574.18  | 1335.56  | 1335.41  |
| 24 hour       | 1751.71  | 1750.26  | 1399.52  | 1397.88  |

Table A3 provides the carbon emissions estimated at different levels of “Time to Start” for columns 1 through 4 of Table 5. We observe that, in Columns 1 and 2, the carbon emissions for power generating units with 24 hours “Time to Start” is noticeably higher than the carbon emissions for power generating units with 12 hours “Time to Start.” The estimated increase in carbon emissions can be traced to differences in the proportions of gas and coal power generating units with 12 and 24 hours of starting times. Our data for power generating units with 12 hour “Time to Start” includes 765 gas and 172 coal plants, but for power generating units with 24 hour “Time to Start” we have 230 gas and 643 coal plants. By contrast, for the analysis with only gas power generating units shown in Columns 3 and 4, we do not see noticeable differences in the emission of power generating units with 12 hours and 24 hours of “Time to Start.”

**Table A4: Fuel Type Usage When Gas and Coal Units Exercise Fuel Flexibility**

| Fuel Type (Percentage) | Gas Units | Coal Units |
|------------------------|-----------|------------|
| Gas                    | 65.83     | 2.72       |
| Coal                   | 3.34      | 92.23      |
| Light Oil              | 21.3      | 0.61       |
| Heavy Oil              | 1.99      | 0.28       |
| Mixed Fuel             | 5.29      | 0.38       |
| Others                 | 2.26      | 3.81       |

Table A4, above, provides details of the various fuel types used by coal and gas power generating unit when they exercise fuel flexibility. When gas units exercise fuel flexibility they use light oil as an alternative fuel for 21.3% of power generation. On the other hand, coal units use smaller percentages of other fuel types. The largest alternative fuel used by coal units when they exercise fuel flexibility is “others”, which accounts for 3.81% of power generation.

We evaluated our regression models by retaining the “mainstream” cases as suggested (i.e., retaining data for gas units which only use gas and light oil when they exercise fuel flexibility and for coal units which only use coal and “others” when they exercise fuel flexibility). The results presented in Table A5, below, are aligned with the main results in Table 2 of the paper.

**Table A5: Results for the “mainstream” cases when gas and coal units exercise fuel flexibility.**

|                            |                                                                                      | Dependent Variable: ln(Carbon Dioxide Emissions per MWH) |                       |                       |                       |                       |                       |
|----------------------------|--------------------------------------------------------------------------------------|----------------------------------------------------------|-----------------------|-----------------------|-----------------------|-----------------------|-----------------------|
|                            |                                                                                      | All Plants                                               |                       | Gas Plants            |                       | Coal Plants           |                       |
|                            |                                                                                      | (1)                                                      | (2)                   | (3)                   | (4)                   | (5)                   | (6)                   |
| <b>H1a</b>                 | Possesses Fuel Flexibility – PFF ( $\beta_1$ )                                       | 0.0316***<br>(0.0076)                                    | 0.0321***<br>(0.0075) | 0.0379***<br>(0.0082) | 0.0382***<br>(0.0082) | -0.0067<br>(0.0101)   | -0.0065<br>(0.0101)   |
| <b>H1b</b>                 | Possesses Volume Flexibility - PVF ( $\beta_2$ )                                     | 0.0930***<br>(0.0130)                                    | 0.0937***<br>(0.0130) | 0.1051***<br>(0.0147) | 0.1057***<br>(0.0146) | 0.003<br>(0.0342)     | 0.0037<br>(0.0343)    |
| <b>H2a</b>                 | Usage of Fuel Flexibility - UFF ( $\beta_3$ )                                        | 0.0970***<br>(0.0148)                                    | 0.1160***<br>(0.0157) | 0.0588***<br>(0.0147) | 0.0895***<br>(0.0160) | 0.1044+<br>(0.0555)   | 0.0521<br>(0.0502)    |
| <b>H2b</b>                 | Usage of Volume Flexibility - UVF ( $\beta_4$ )                                      | 0.0015***<br>0.0000                                      | 0.0015***<br>(0.0001) | 0.0014***<br>(0.0001) | 0.0014***<br>(0.0001) | 0.0048***<br>(0.0006) | 0.0047***<br>(0.0006) |
| <b>H3</b>                  | Usage of Volume Flexibility - UVF X<br>Usage of Fuel Flexibility - UFF ( $\beta_5$ ) |                                                          | -0.0007+<br>(0.0003)  |                       | -0.0009**<br>(0.0003) |                       | 0.0092+<br>(0.0052)   |
| <b>Controls</b>            |                                                                                      |                                                          |                       |                       |                       |                       |                       |
|                            | Fuel Cost per MMBtu (USD)                                                            | 0.0007*<br>(0.0003)                                      | 0.0007*<br>(0.0003)   | 0.0006+<br>(0.0003)   | 0.0006+<br>(0.0003)   | 0.0095*<br>(0.0037)   | 0.0094*<br>(0.0037)   |
|                            | Fuel Emission Intensity (CO <sub>2</sub> /MMBtu)                                     | 0.0048***<br>(0.0002)                                    | 0.0049***<br>(0.0002) | 0.0052***<br>(0.0002) | 0.0052***<br>(0.0002) | 0.0009<br>(0.0011)    | 0.001<br>(0.0011)     |
|                            | Generating Hours                                                                     | -0.0002***<br>0.0000                                     | -0.0002***<br>0.0000  | -0.0002***<br>0.0000  | -0.0002***<br>0.0000  | -0.0002***<br>0.0000  | -0.0002***<br>0.0000  |
|                            | Age (months)                                                                         | 0.0006***<br>0.0000                                      | 0.0006***<br>0.0000   | 0.0007***<br>0.0000   | 0.0007***<br>0.0000   | 0<br>0.0000           | 0<br>0.0000           |
|                            | Capacity (in MW)                                                                     | -0.0001***<br>0.0000                                     | -0.0001***<br>0.0000  | -0.0002***<br>0.0000  | -0.0002***<br>0.0000  | -0.0002***<br>0.0000  | -0.0002***<br>0.0000  |
|                            | Fraction - Renewable                                                                 | 0.0473*<br>(0.0225)                                      | 0.0472*<br>(0.0225)   | 0.0887**<br>(0.0328)  | 0.0884**<br>(0.0328)  | -0.0199<br>(0.0306)   | -0.0199<br>(0.0305)   |
|                            | Constant                                                                             | 6.5889***<br>(0.0353)                                    | 6.5883***<br>(0.0352) | 6.5085***<br>(0.0466) | 6.5108***<br>(0.0463) | 7.7209***<br>(0.2309) | 7.7135***<br>(0.2297) |
| <b>Other Fixed Effects</b> |                                                                                      |                                                          |                       |                       |                       |                       |                       |
|                            | SO <sub>2</sub> Control Equipment                                                    | Yes                                                      | Yes                   | Yes                   | Yes                   | Yes                   | Yes                   |
|                            | NOX Control Equipment                                                                | Yes                                                      | Yes                   | Yes                   | Yes                   | Yes                   | Yes                   |
|                            | Mercury Control Equipment                                                            | Yes                                                      | Yes                   | Yes                   | Yes                   | Yes                   | Yes                   |
|                            | CO <sub>2</sub> Control Equipment                                                    | Yes                                                      | Yes                   | Yes                   | Yes                   | Yes                   | Yes                   |
|                            | State                                                                                | Yes                                                      | Yes                   | Yes                   | Yes                   | Yes                   | Yes                   |
|                            | Year, Month                                                                          | Yes                                                      | Yes                   | Yes                   | Yes                   | Yes                   | Yes                   |
|                            | R-Square                                                                             | 0.6160***                                                | 0.6162***             | 0.4586***             | 0.4587***             | 0.203                 | 0.2041                |
|                            | Number of Generating Units                                                           | 3133                                                     | 3133                  | 2314                  | 2314                  | 819                   | 819                   |
|                            | Number                                                                               | 419619                                                   | 419619                | 262273                | 262273                | 157346                | 157346                |

Notes: +  $p < 0.10$ , \*  $p < 0.05$ , \*\*  $p < 0.01$ , \*\*\*  $p < 0.001$ ; Coefficient estimates reported with robust standard errors clustered at the power generating unit level in parentheses.

**Table A6: Regression Results without controls for carbon control equipment**

|                            |                                                                                      | Dependent Variable: ln(Carbon Dioxide Emissions per MWH) |                       |                       |                        |                       |                       |
|----------------------------|--------------------------------------------------------------------------------------|----------------------------------------------------------|-----------------------|-----------------------|------------------------|-----------------------|-----------------------|
|                            |                                                                                      | All Plants                                               |                       | Gas Plants            |                        | Coal Plants           |                       |
|                            |                                                                                      | (1)                                                      | (2)                   | (3)                   | (4)                    | (5)                   | (6)                   |
| <b>H1a</b>                 | Possesses Fuel Flexibility – PFF ( $\beta_1$ )                                       | 0.0269***<br>(0.0073)                                    | 0.0276***<br>(0.0073) | 0.0352***<br>(0.0080) | 0.0355***<br>(0.0080)  | -0.0025<br>(0.0098)   | -0.0022<br>(0.0098)   |
| <b>H1b</b>                 | Possesses Volume Flexibility - PVF ( $\beta_2$ )                                     | 0.0920***<br>(0.0130)                                    | 0.0930***<br>(0.0130) | 0.1055***<br>(0.0147) | 0.1063***<br>(0.0146)  | 0.0046<br>(0.0329)    | 0.0049<br>(0.0329)    |
| <b>H2a</b>                 | Usage of Fuel Flexibility - UFF ( $\beta_3$ )                                        | 0.0677***<br>(0.0114)                                    | 0.0883***<br>(0.0118) | 0.0450***<br>(0.0121) | 0.0733***<br>(0.0128)  | 0.0434<br>(0.0389)    | 0.0185<br>(0.0352)    |
| <b>H2b</b>                 | Usage of Volume Flexibility - UVF ( $\beta_4$ )                                      | 0.0014***<br>0.0000                                      | 0.0014***<br>0.0000   | 0.0014***<br>0.0000   | 0.0014***<br>0.0000    | 0.0048***<br>(0.0006) | 0.0047***<br>(0.0006) |
| <b>H3</b>                  | Usage of Volume Flexibility - UVF X<br>Usage of Fuel Flexibility - UFF ( $\beta_5$ ) |                                                          | -0.0009**<br>(0.0003) |                       | -0.0011***<br>(0.0003) |                       | 0.0047<br>(0.0040)    |
| <b>Controls</b>            |                                                                                      |                                                          |                       |                       |                        |                       |                       |
|                            | Fuel Cost per MMBtu (USD)                                                            | 0.0007*<br>(0.0003)                                      | 0.0007*<br>(0.0003)   | 0.0006*<br>(0.0003)   | 0.0006*<br>(0.0003)    | 0.0091*<br>(0.0036)   | 0.0091*<br>(0.0035)   |
|                            | Fuel Emission Intensity (CO <sub>2</sub> /MMBtu)                                     | 0.0047***<br>(0.0002)                                    | 0.0047***<br>(0.0002) | 0.0049***<br>(0.0002) | 0.0049***<br>(0.0002)  | 0.0016+<br>(0.0009)   | 0.0017+<br>(0.0009)   |
|                            | Generating Hours                                                                     | -0.0002***<br>0.0000                                     | -0.0002***<br>0.0000  | -0.0002***<br>0.0000  | -0.0002***<br>0.0000   | -0.0002***<br>0.0000  | -0.0002***<br>0.0000  |
|                            | Age (months)                                                                         | 0.0006***<br>0.0000                                      | 0.0006***<br>0.0000   | 0.0007***<br>0.0000   | 0.0007***<br>0.0000    | -0.0001<br>0.0000     | -0.0001<br>0.0000     |
|                            | Capacity (in MW)                                                                     | -0.0001***<br>0.0000                                     | -0.0001***<br>0.0000  | -0.0002***<br>0.0000  | -0.0002***<br>0.0000   | -0.0002***<br>0.0000  | -0.0002***<br>0.0000  |
|                            | Fraction - Renewable                                                                 | 0.0452*<br>(0.0225)                                      | 0.0446*<br>(0.0225)   | 0.0829*<br>(0.0330)   | 0.0813*<br>(0.0329)    | -0.0141<br>(0.0298)   | -0.0146<br>(0.0298)   |
|                            | Constant                                                                             | 6.6188***<br>(0.0333)                                    | 6.6169***<br>(0.0332) | 6.5542***<br>(0.0438) | 6.5546***<br>(0.0435)  | 7.5842***<br>(0.1881) | 7.5755***<br>(0.1875) |
| <b>Other Fixed Effects</b> |                                                                                      |                                                          |                       |                       |                        |                       |                       |
|                            | SO <sub>2</sub> Control Equipment                                                    | Yes                                                      | Yes                   | Yes                   | Yes                    | Yes                   | Yes                   |
|                            | NOX Control Equipment                                                                | Yes                                                      | Yes                   | Yes                   | Yes                    | Yes                   | Yes                   |
|                            | Mercury Control Equipment                                                            | Yes                                                      | Yes                   | Yes                   | Yes                    | Yes                   | Yes                   |
|                            | State                                                                                | Yes                                                      | Yes                   | Yes                   | Yes                    | Yes                   | Yes                   |
|                            | Year, Month                                                                          | Yes                                                      | Yes                   | Yes                   | Yes                    | Yes                   | Yes                   |
|                            | R-Square                                                                             | 0.6100***                                                | 0.6103***             | 0.4630***             | 0.4634***              | 0.2058                | 0.2063                |
|                            | Number of Generating Units                                                           | 3,135                                                    | 3,135                 | 2,316                 | 2,316                  | 819                   | 819                   |
|                            | Number                                                                               | 436,312                                                  | 436,312               | 275,266               | 275,266                | 161,046               | 161,046               |

Notes: +  $p < 0.10$ , \*  $p < 0.05$ , \*\*  $p < 0.01$ , \*\*\*  $p < 0.001$ ; Coefficient estimates reported with robust standard errors clustered at the power generating unit level in parentheses.
